# Supplementary material
Source: publisher figshare collection journal article supplement (https://springernature.figshare.com/ndownloader/files/22849775)
Supplement: Supplementary file 1 [file 22849775]

**Additional file 1:** Venn diagram depicting the 54 genes covered by the respective panel. The genes in which alterations were detected by NGS sequencing are indicated in red. (N = 100, lung cancer cases)

**
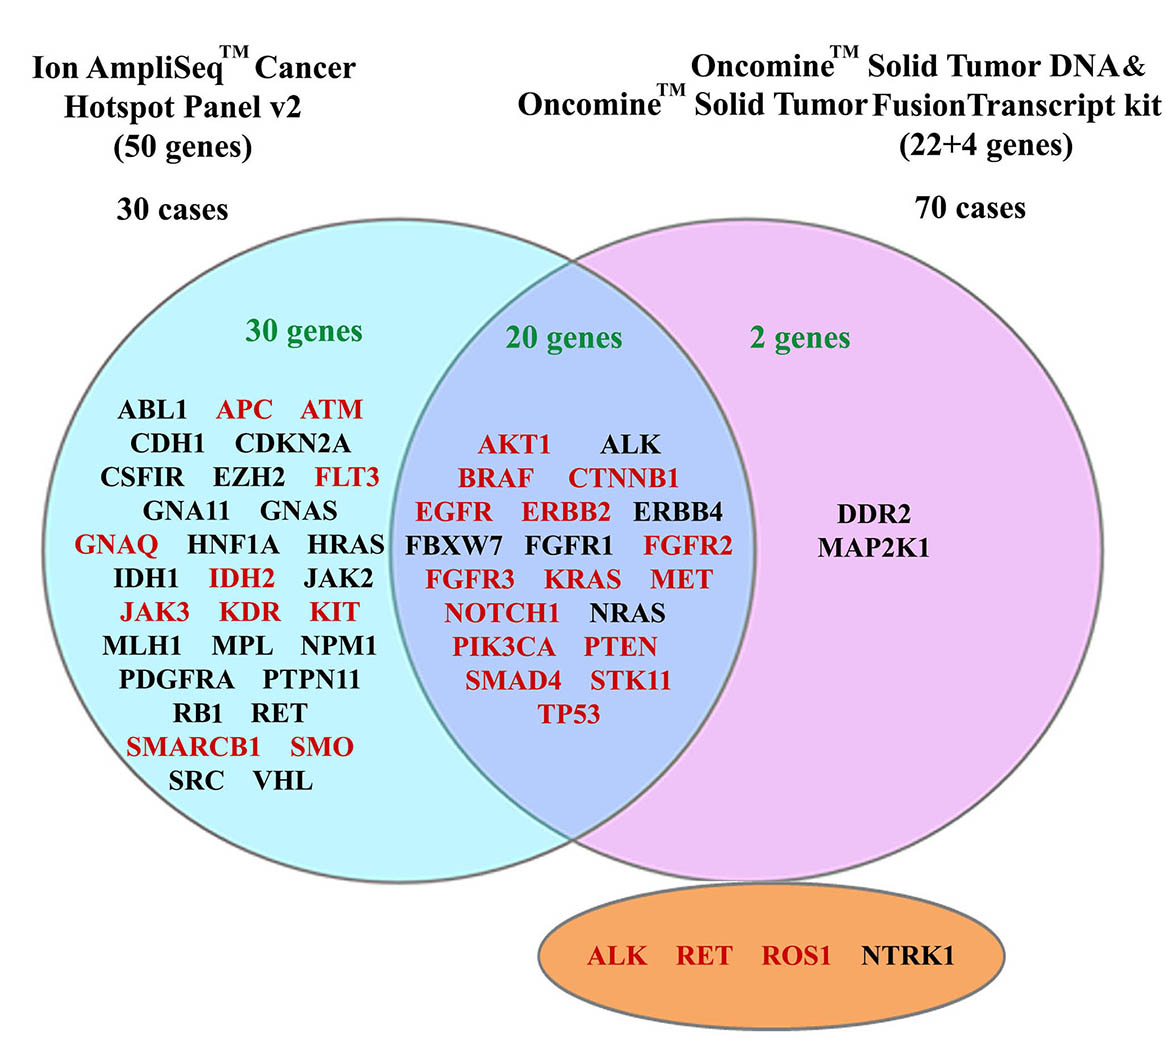
**
